# Supplementary material
Source: MDPI journal article supplement (https://www.mdpi.com/2504-5377/2/4/74)
Supplement: s1 [file s1]

Archive with 2 entries (2 files):
- Video_S1_Superhydrophobic ZnO urchin.avi
- colloids-401254-supplementary.pdf
