# Supplementary material
Source: MDPI journal article supplement (https://www.mdpi.com/2504-5377/2/4/74)
Supplement: s1 [file s1 › colloids-401254-supplementary.pdf]

## Supplementary Information

*for*

# Facile Fabrication of Multifunctional ZnO Urchins

Abinash Tripathy<sup>‡,¥</sup>, Patryk Wąsik<sup>‡,ψ</sup>, Syama Sreedharan<sup>||</sup>, Dipankar Nandi<sup>||</sup>, Oier Bikondoa<sup>‡,£</sup>, Bo Su<sup>§</sup>, Prosenjit Sen<sup>¥</sup> and Wuge H. Briscoe<sup>‡</sup>(✉)

<sup>‡</sup> - School of Chemistry, University of Bristol, Cantock's Close, Bristol BS8 1TS, United Kingdom.

<sup>¥</sup> - Centre for Nano Science and Engineering, Indian Institute of Science, Bangalore, India, 560012.

<sup>ψ</sup> - Bristol Centre for Functional Nanomaterials (BCFN), HH Wills Physics Laboratory, University of Bristol, Tyndall Avenue, Bristol BS8 1TL, United Kingdom.

<sup>||</sup> - Department of Biochemistry, Indian Institute of Science, Bangalore, India, 560012.

<sup>†</sup> - XMas, The UK CRG Beamline at the ESRF, The European Synchrotron, 71, avenue des Martyrs, CS 40220, 38043 Grenoble Cedex 9, France.

<sup>£</sup> - Department of Physics, University of Warwick, Gibbet Hill Road, CV4 7AL, Coventry, United Kingdom.

<sup>§</sup> - Bristol Dental School, University of Bristol, Bristol BS1 2LY, United Kingdom.

Corresponding Author: [Wuge.Briscoe@bristol.ac.uk](mailto:Wuge.Briscoe@bristol.ac.uk)

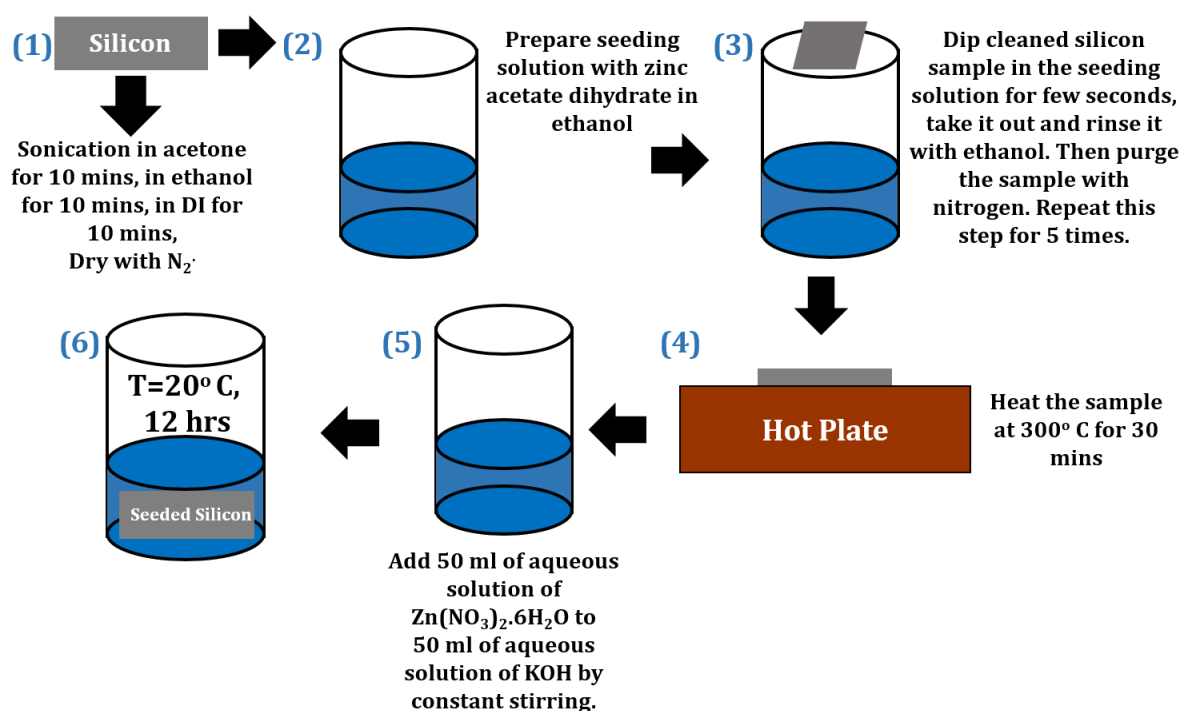

Figure S1: Process flow of the fabrication of ZnO nanostructures on seeded silicon substrates at near room temperature.

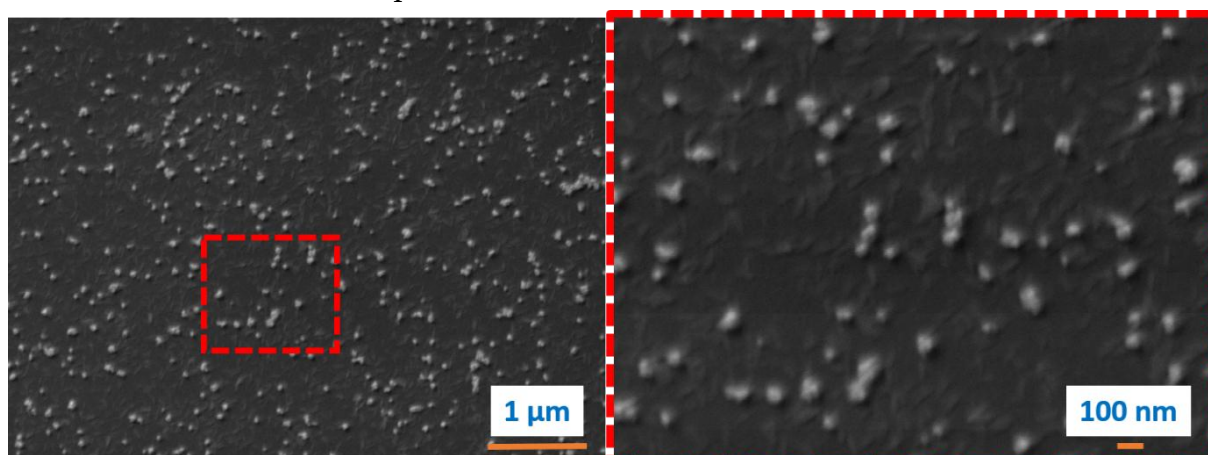

Figure S2: SEM images of a silicon substrate seeded with ZnO nanoislands in 5 mM zinc acetate dihydrate solution (dipping  $\times 5$  times and annealed at  $300^\circ\text{C}$  for 30 minutes).

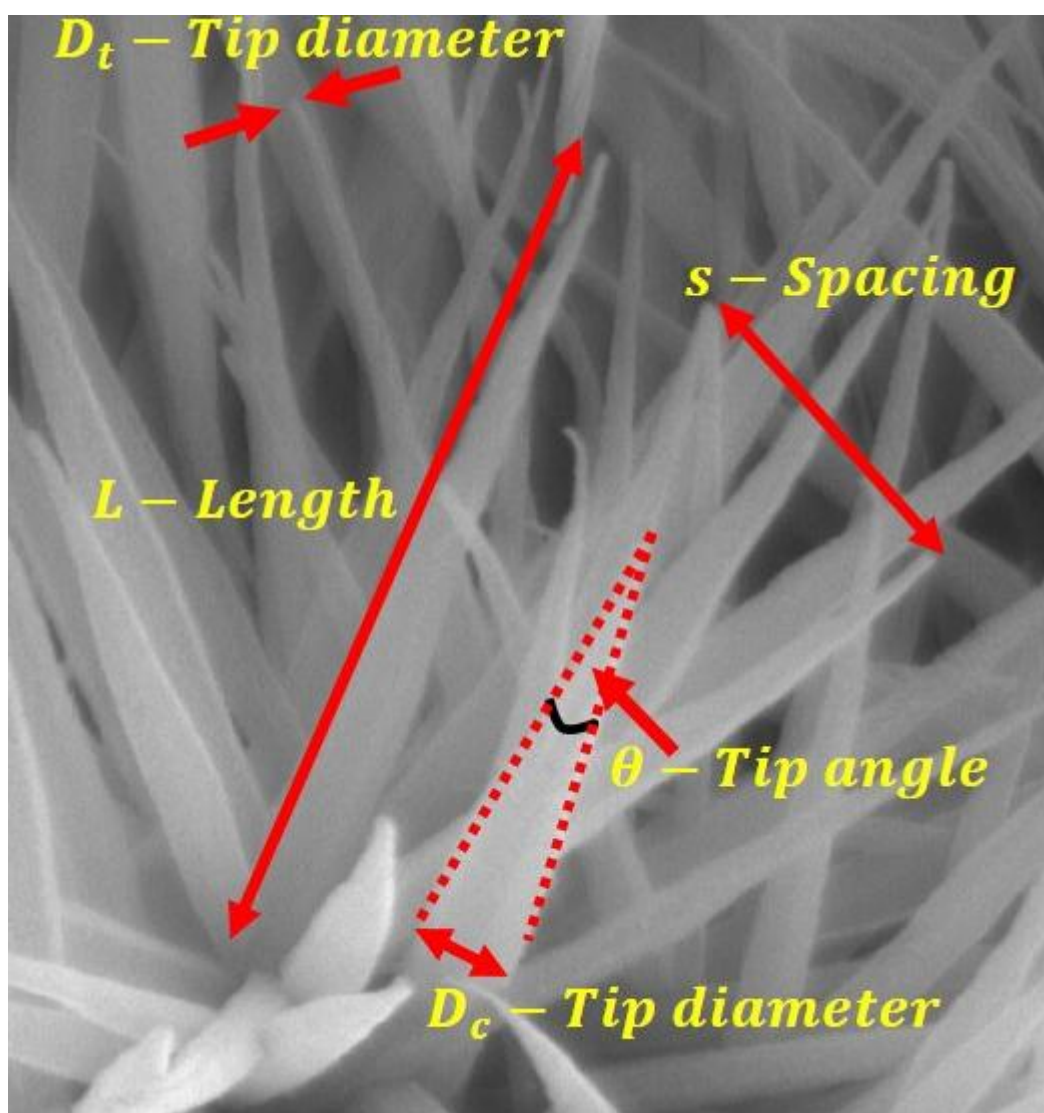

Figure S3: Nanoneedle dimension measurement using ImageJ software. The values in the main text were averaged from 50 different needles, with the measurements of different parameters at each single needle repeated 5 times.

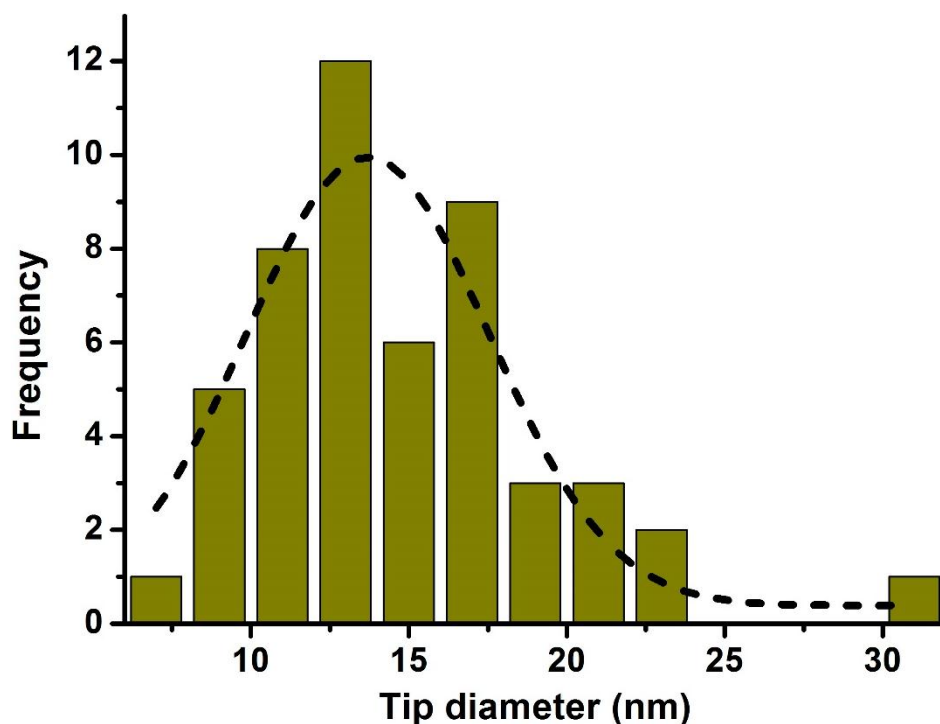

Figure S4: Size distribution from ImageJ analysis of the nanoneedle tip diameter at the top  $D_t$  urchins ranging from 7-30 nm with an average diameter of  $D_t = 13 \pm 7$  nm.

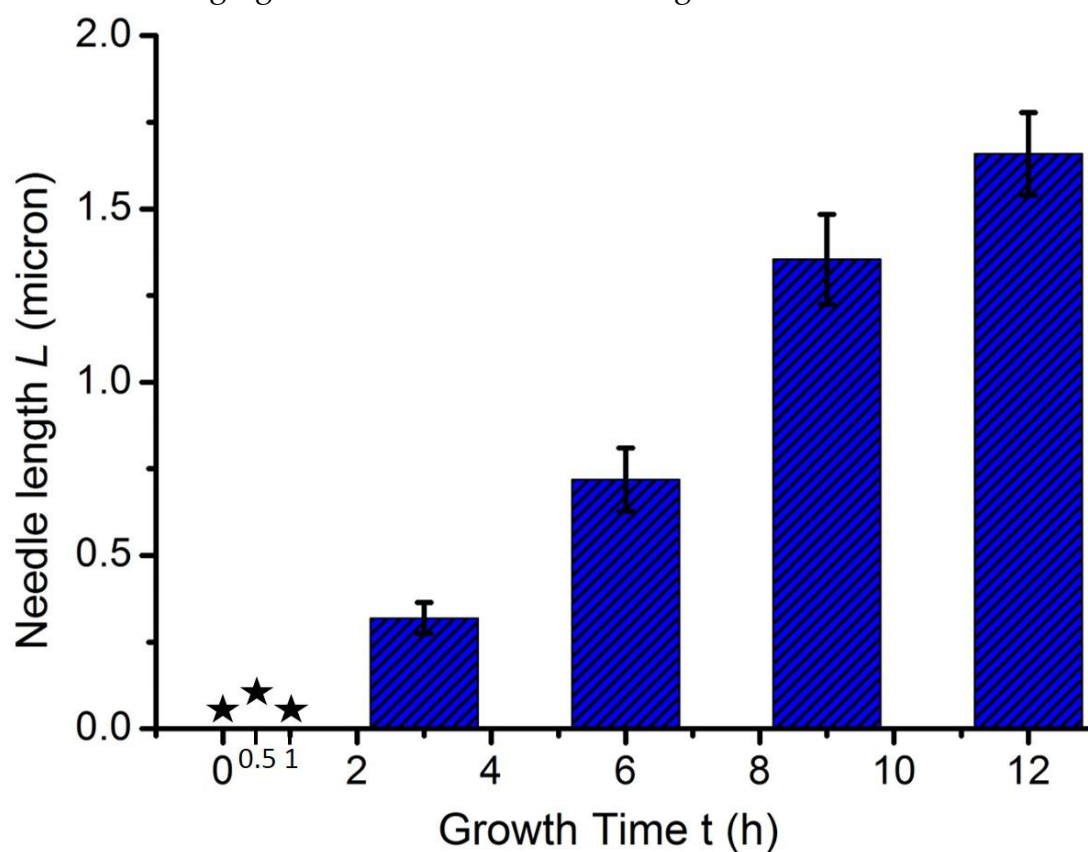

Figure S5: Length of the nanoneedles  $L$  in the urchin structure vs. growth time. Length of the nanoneedle was found to increase with respect to synthesis time. Stars in figure shows that for time points 0, 0.5 and 1 h there was no formation of urchin structures.

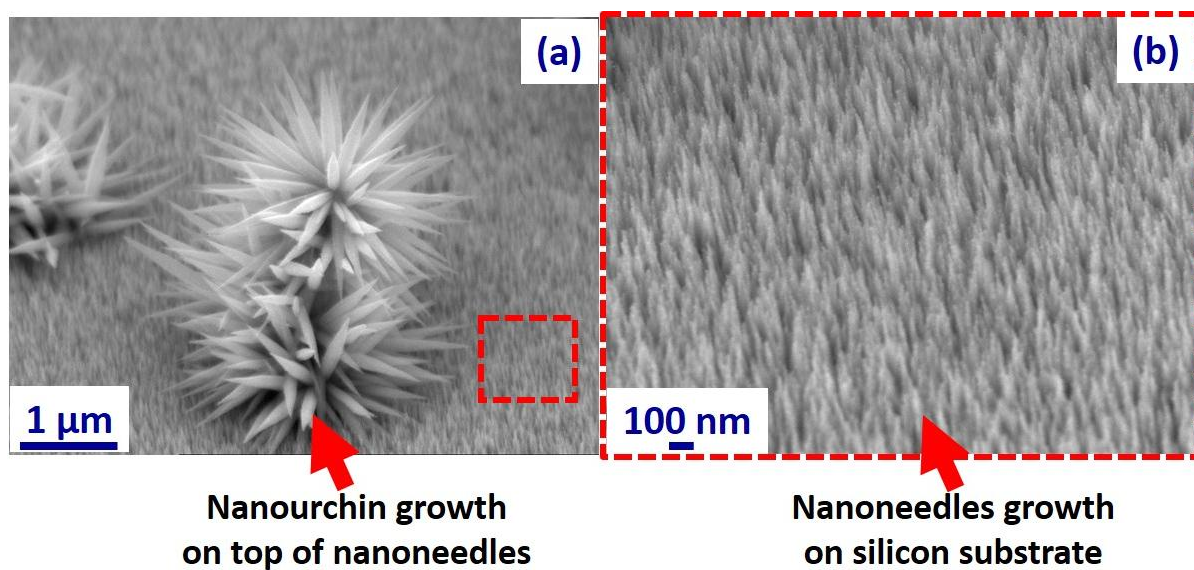

Figure S6: (a) the angled view after 9 h growth, showing ZnO urchins on the top of highly (b) oriented ZnO nanoneedles.

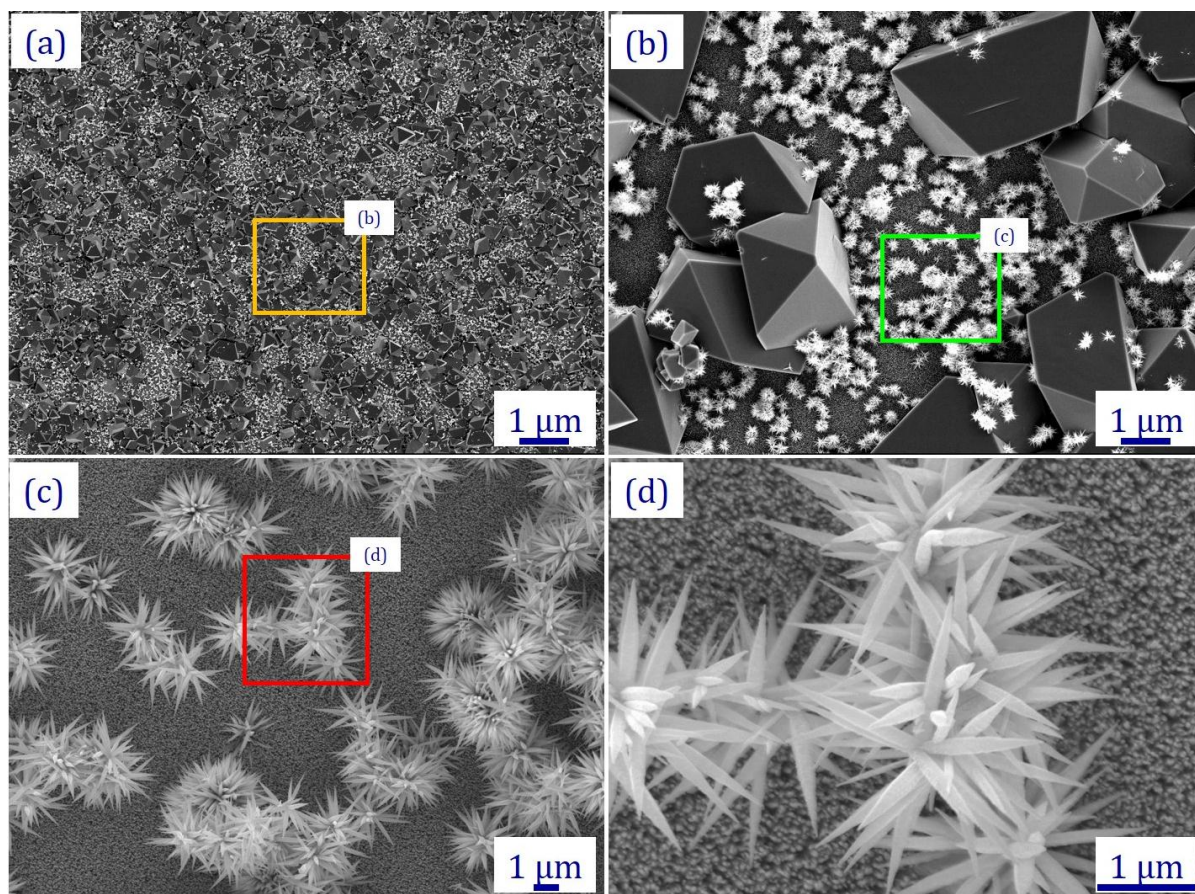

Figure S7: Representative FESEM images of the seeded silicon substrate post 12 h synthesis in the zincate solution.

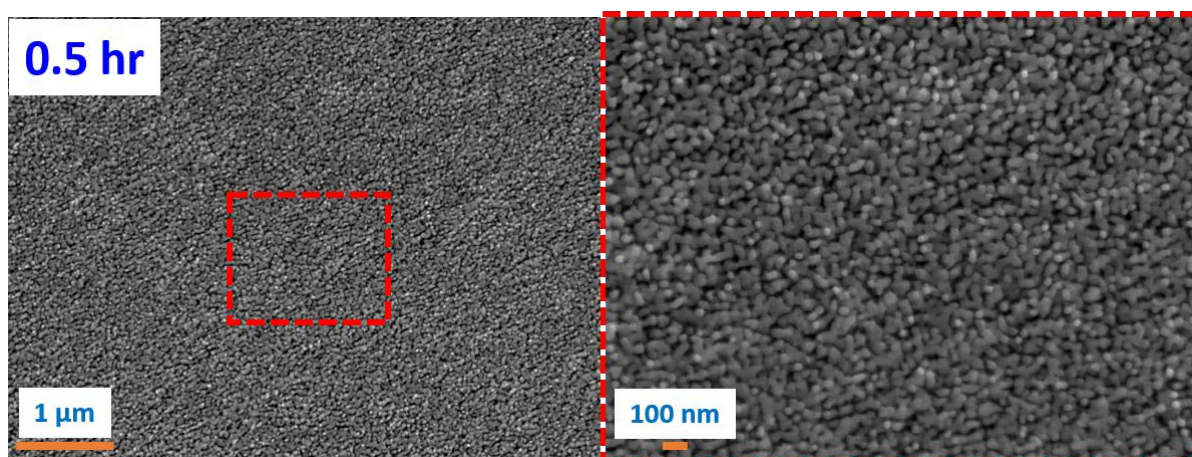

(a)

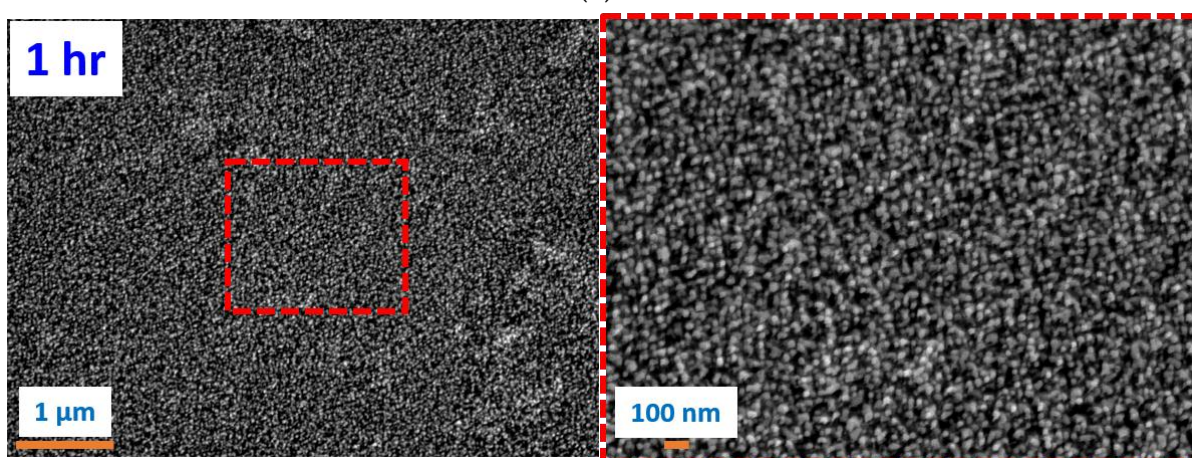

(b)

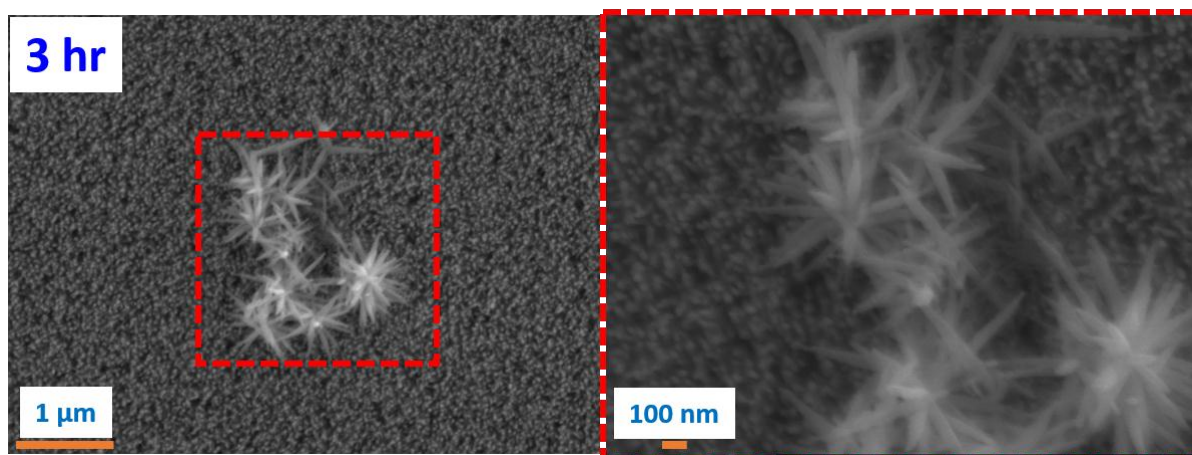

(c)

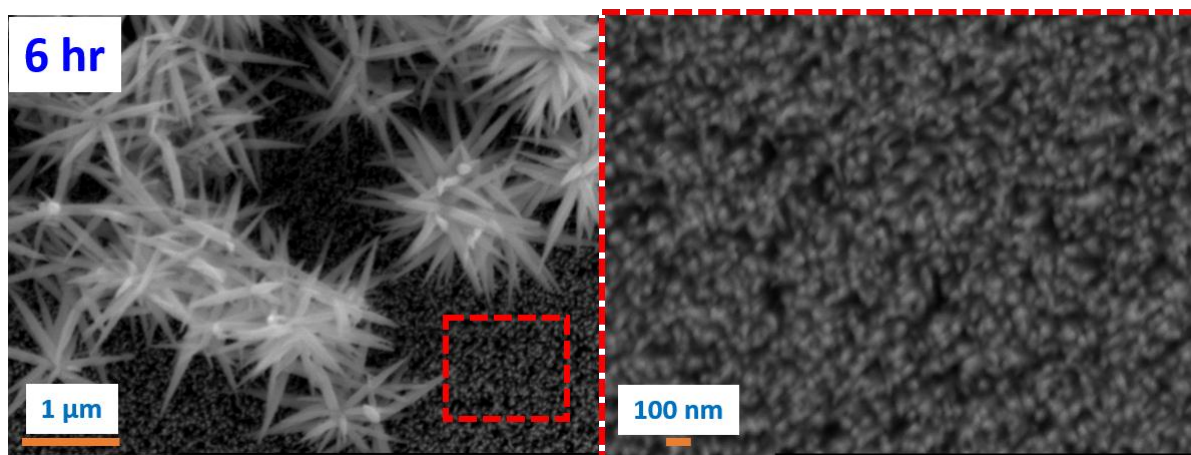

(d)

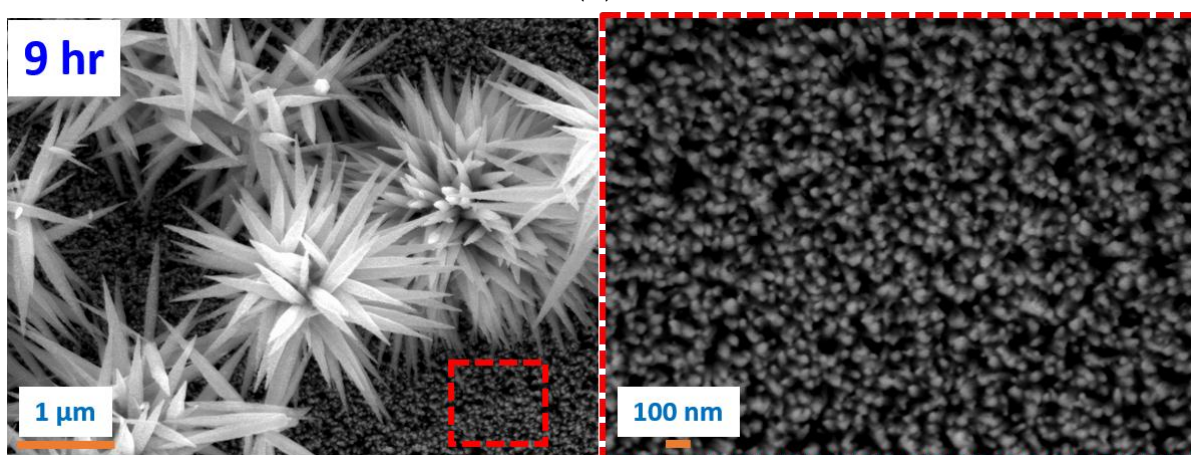

(e)

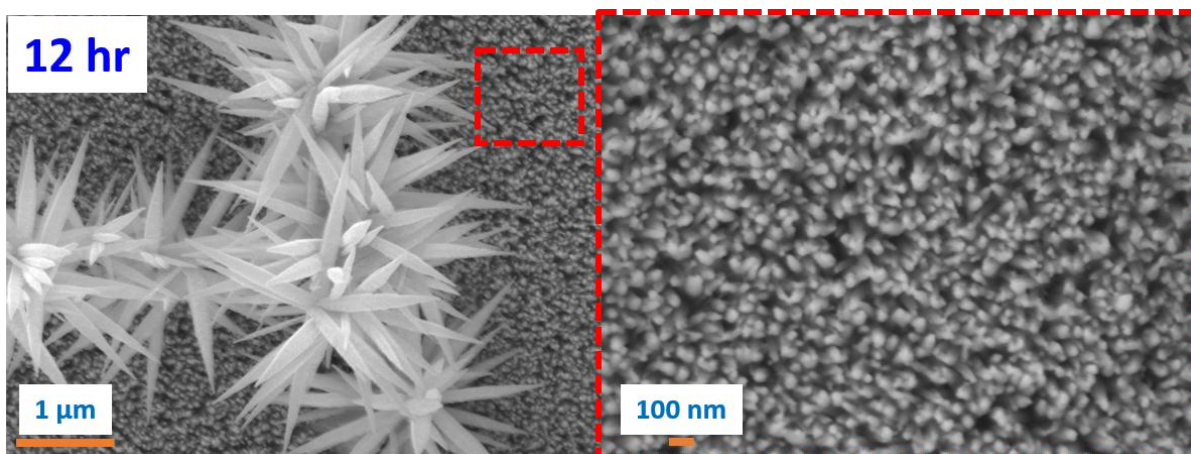

(f)

Figure S8: SEM images of seeded silicon substrates after growth in zincate solution at different time intervals. Density of ZnO nano urchins was found to increase with the increase synthesis time.

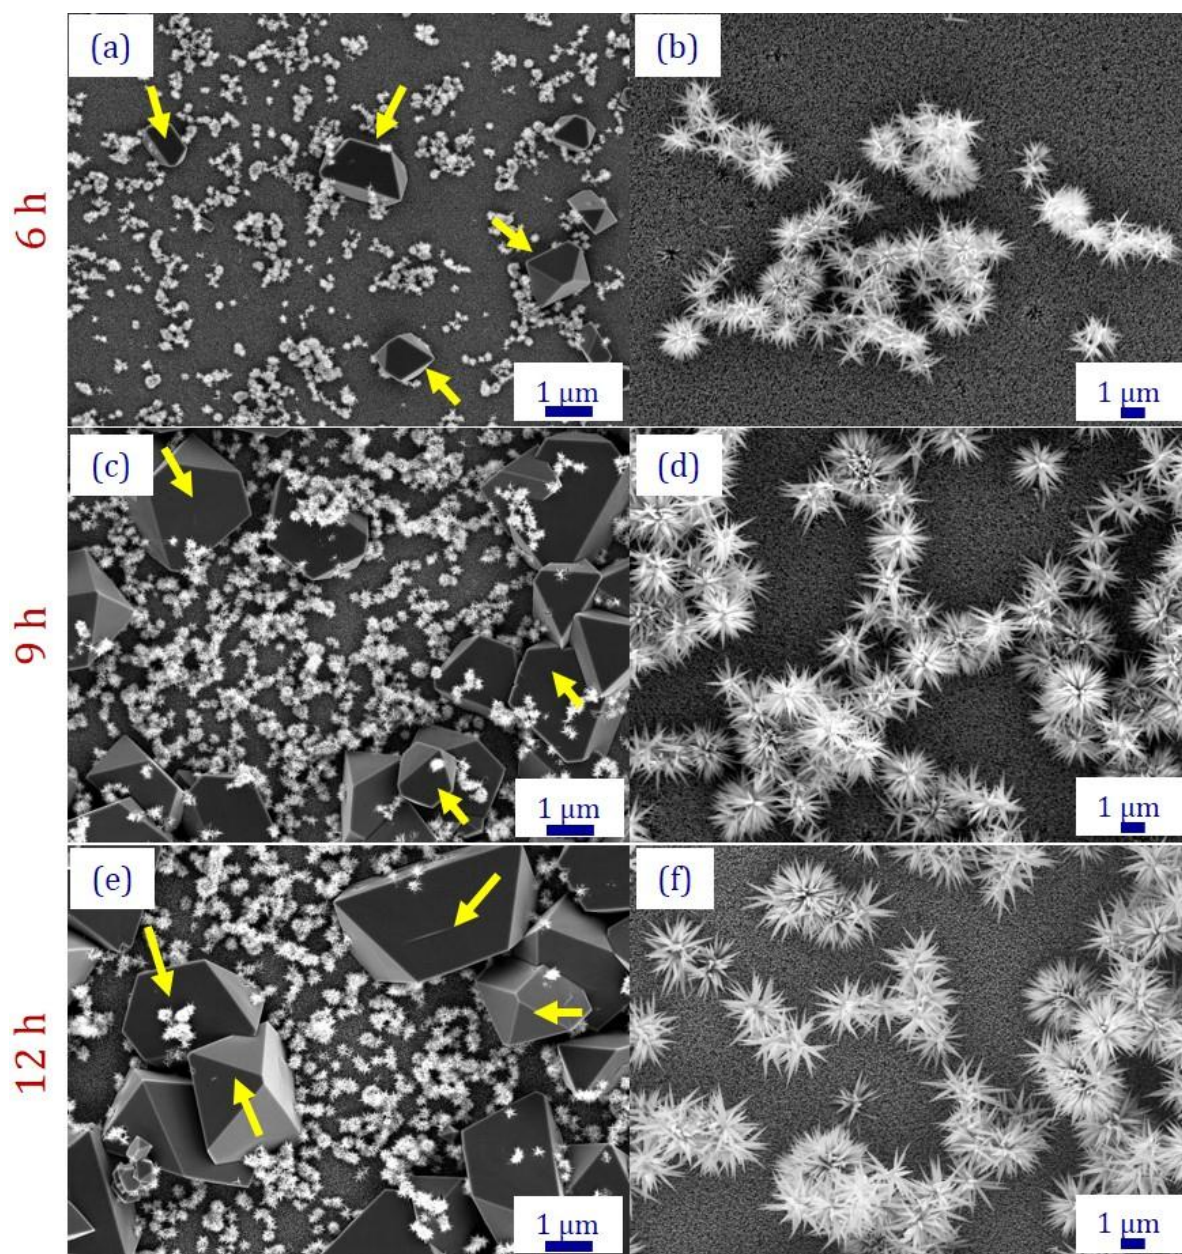

Figure S9: SEM images of seeded silicon substrates after growth in zincate solution at different time intervals. Zn(OH)<sub>2</sub> crystals were observed on the substrates for synthesis time  $t > 3$  h.

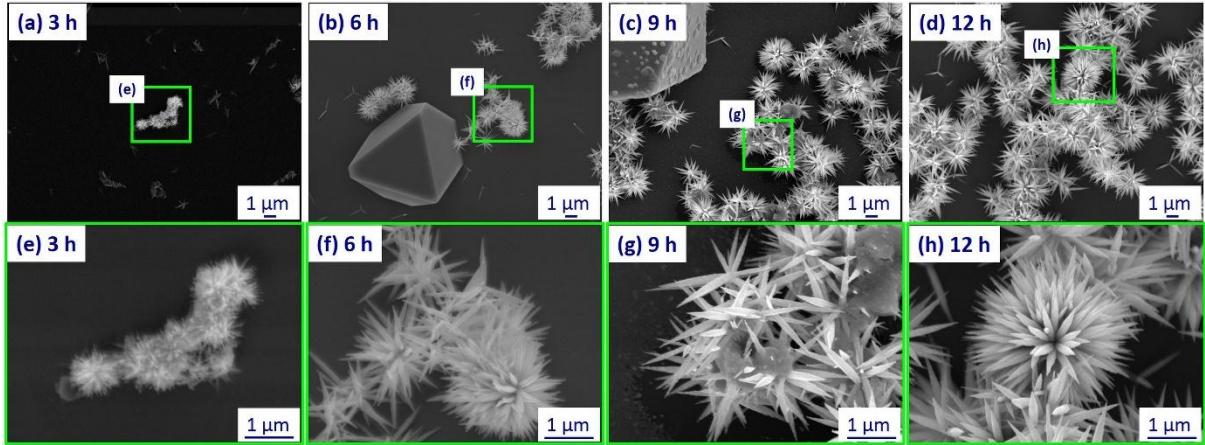

Figure S10: SEM images of ZnO urchins on a non-seeded silicon substrate, taken at different time intervals: (a) 3 h, (b) 6 h, (c) 9 h, and (d) 12 h. (e-h) show enlarged views of the square regions as labelled in (a-d), respectively.

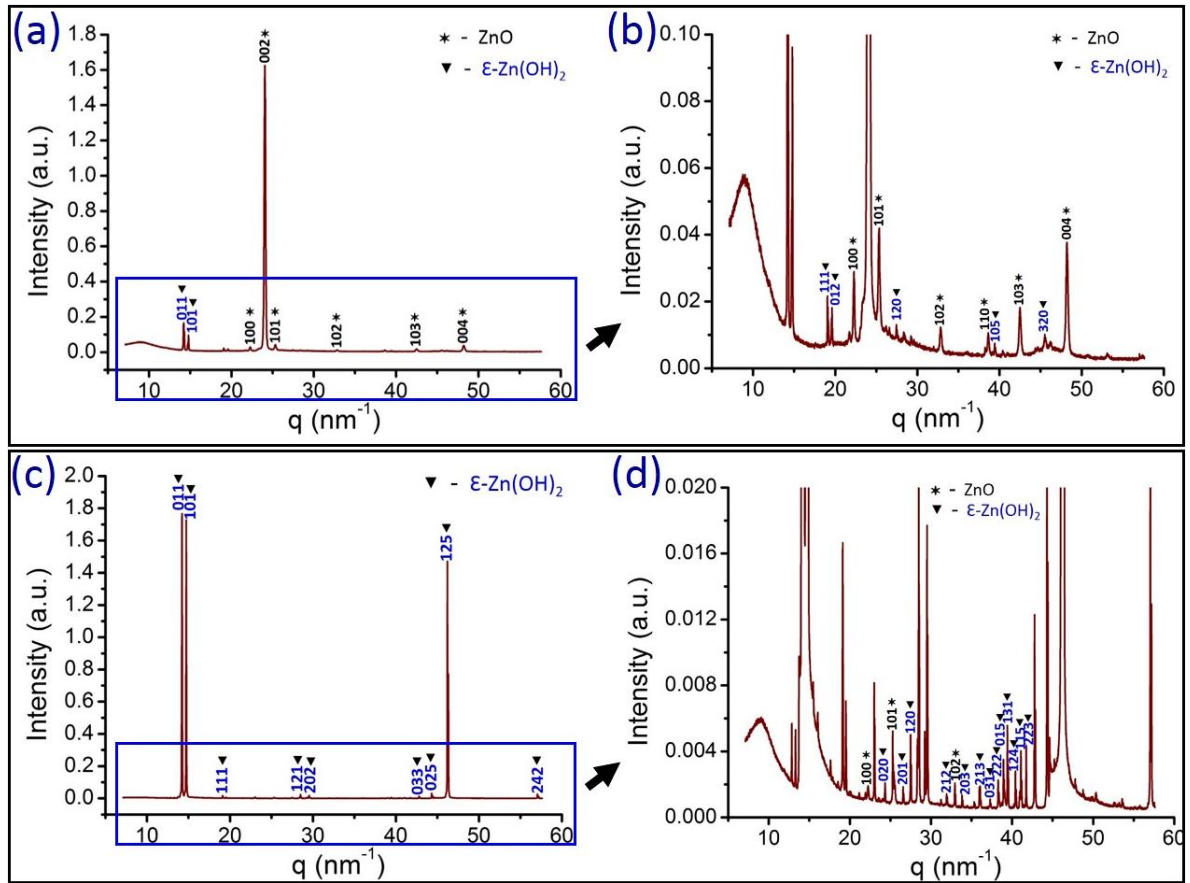

Figure S11: XRD of (a)&(b) seeded and (c)&(d) unseeded silicon substrates after growth in the zincate solution at 20° C for 12 h, with the ZnO and  $\epsilon$ -Zn(OH)<sub>2</sub> peaks indicated by \* and ▼, respectively, and the enlarged views shown on the right-hand side.

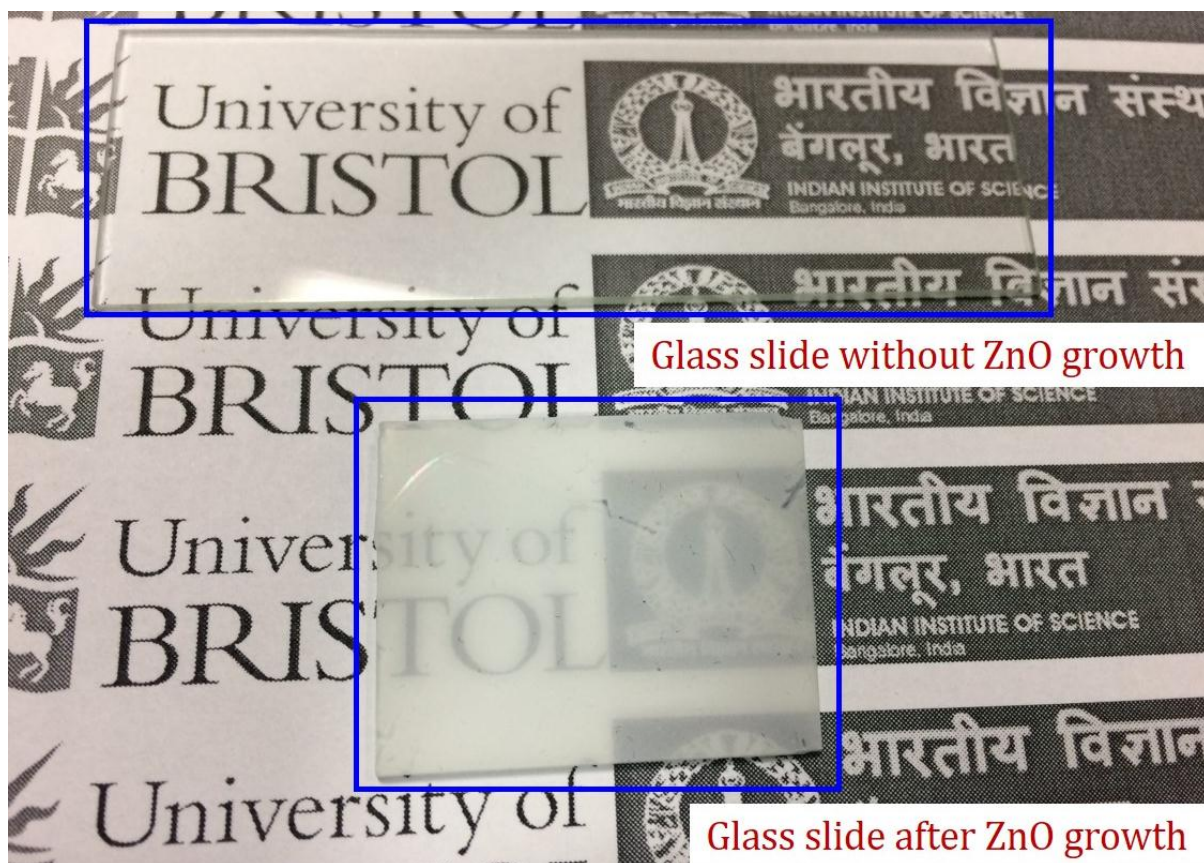

Figure S12: Optical image showing the loss in transparency after the formation of ZnO urchin/nanoneedles on the glass substrate.

Table S1: Contact angles of DI water droplet on different substrates

|                                                                                                                         |                                                                                                                                                                             |
|-------------------------------------------------------------------------------------------------------------------------|-----------------------------------------------------------------------------------------------------------------------------------------------------------------------------|
| <p>Bare, unmodified silicon (<i>Hydrophilic</i>)<br/>CA - 36.5°</p>                                                     | <p>1 mm <span style="color: red;">Flat Silicon</span></p> 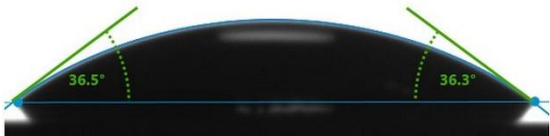                                |
| <p>Silicon with 20 nm thin film of ZnO (<i>Hydrophilic</i>)<br/>CA - 59.8°</p>                                          | <p>1 mm <span style="color: red;">Flat ZnO</span></p> 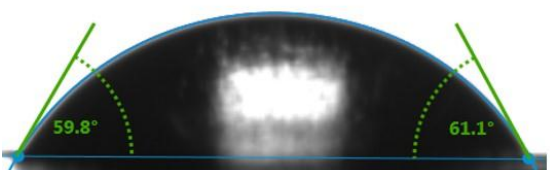                                    |
| <p>Seeded silicon substrate with grown ZnO Urchins (<i>Superhydrophilic</i>)<br/>CA - 0°</p>                            | <p>1 mm <span style="color: red;">seeded silicon substrate after growth</span></p> 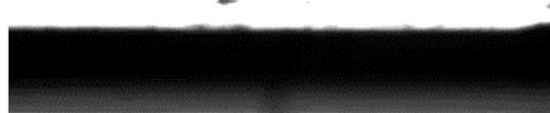      |
| <p>Non-seeded silicon substrate after growth (<i>Superhydrophilic</i>)<br/>CA - 0°</p>                                  | <p>1 mm <span style="color: red;">non-seeded silicon substrate after growth</span></p> 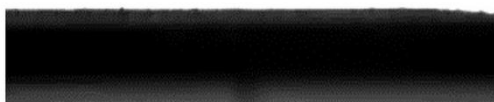 |
| <p>Seeded silicon substrate with grown ZnO nanostructures with silanization (<i>Superhydrophobic</i>)<br/>CA - 159°</p> | <p>1 mm <span style="color: red;">Silanized seeded substrate after growth</span></p> 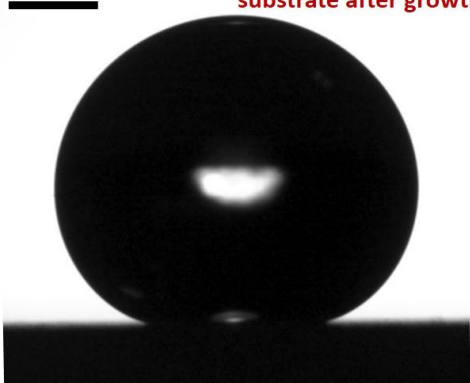   |

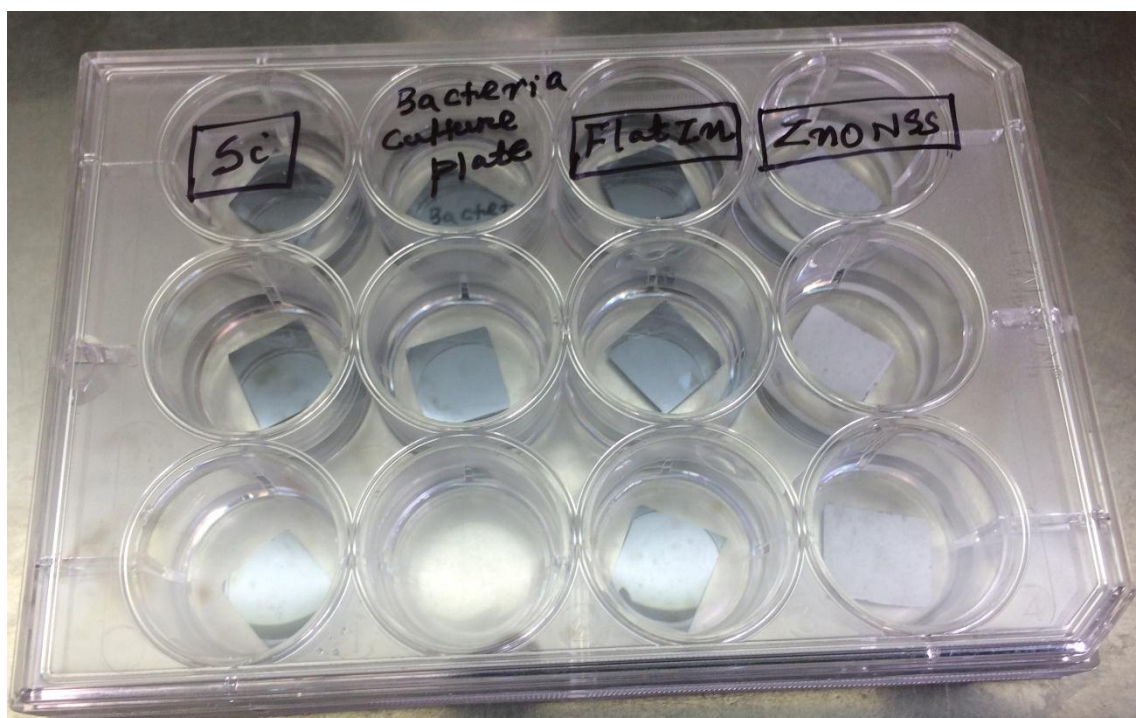

Figure S13: 12 well culture plate for pouring the bacterial suspension on different samples.

Table S2: SEM of *E. coli* on different substrates

|                                                                                                                                                                                              |                                                                                      |
|----------------------------------------------------------------------------------------------------------------------------------------------------------------------------------------------|--------------------------------------------------------------------------------------|
| <p>Bare,<br/>unmodified<br/>silicon<br/>(<i>bacteria<br/>observed on<br/>the surface</i>)</p>                                                                                                | 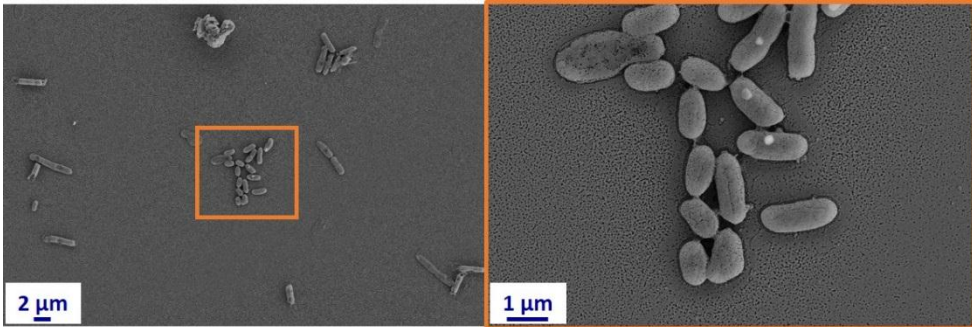   |
| <p>Silicon with<br/>20 nm thin<br/>film of ZnO<br/>(<i>bacteria<br/>observed on<br/>the surface</i>)</p>                                                                                     | 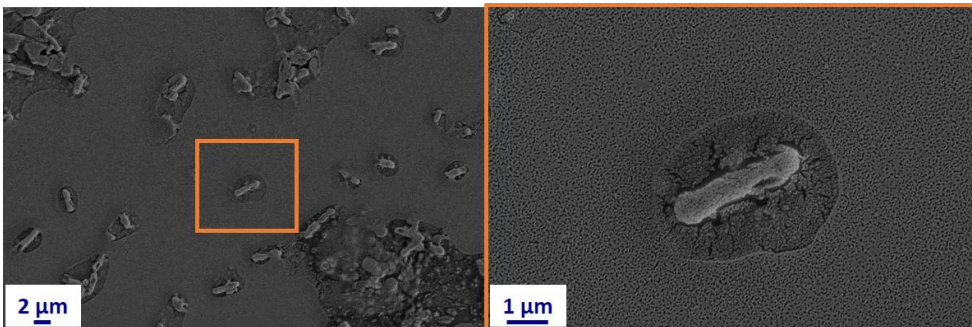  |
| <p>ZnO Micro-<br/>urchin<br/>Surface<br/>(<i>No bacteria<br/>colony was<br/>found on the<br/>surface.<br/>However,<br/>morphology<br/>of the ZnO<br/>nanowires<br/>was<br/>changed.</i>)</p> | 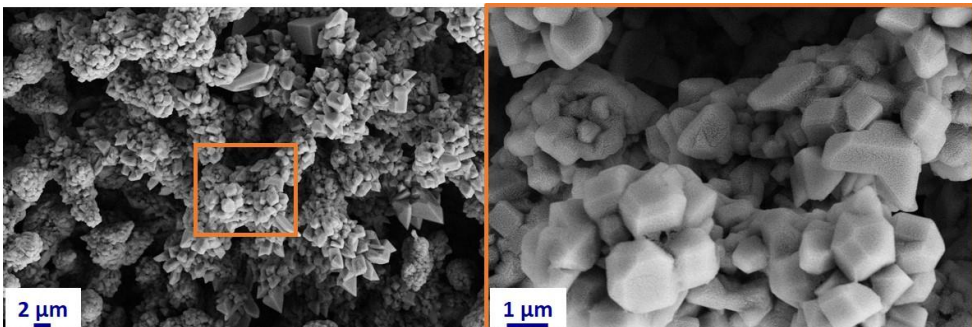 |

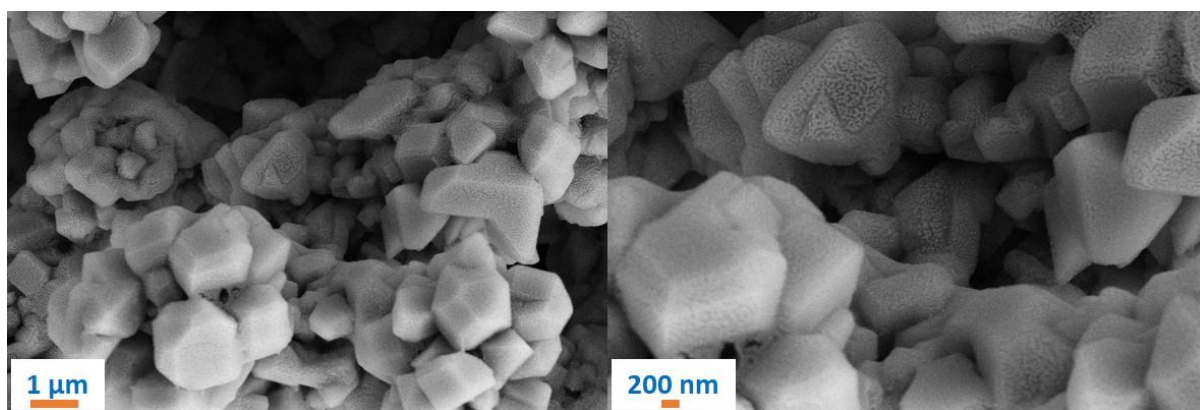

(a)

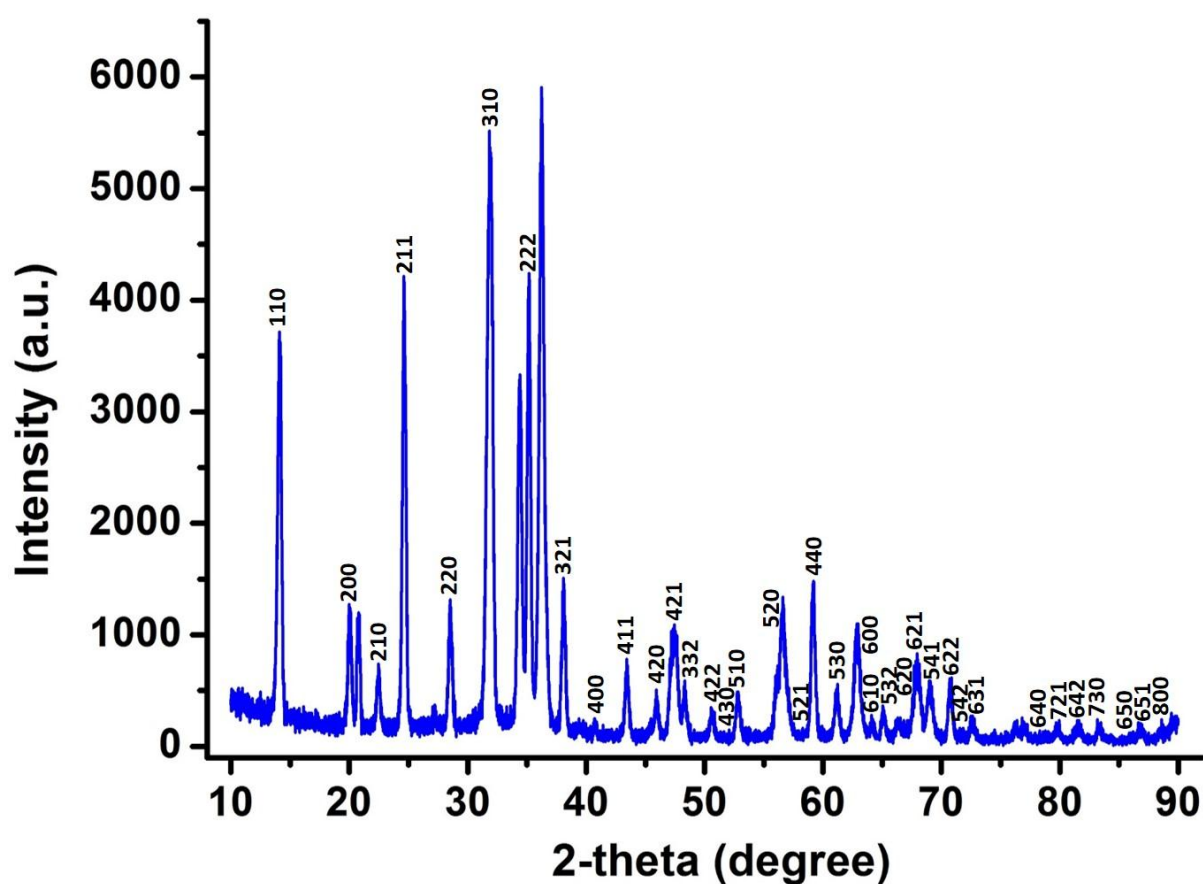

(b)

Figure S14: (a) SEM and (b) XRD of ZnO nanourchin surface after pouring the bacterial culture for 24 hours. Formation of sodium zinc phosphate hydrate ( $\text{NaZn-PO}_4\cdot\text{H}_2\text{O}$ ) was observed on the surface due to the reaction of ZnO with PBS leading to the change in morphology of the spiky ZnO nanowires.
